# Supplementary material
Source: publisher figshare collection journal article supplement (https://sage.figshare.com/ndownloader/files/22784192)
Supplement: Supplementary file 1 [file 22784192]

## Appendix A. Mixed Effects Models for Chronic Conditions, Work Limitations, Disability, Psychological Distress, and Body Mass Index

## Mixed Effects Models for Number of Chronic Conditions

|                                  | Model 1   | Model 2a  | Model 2b  | Model 3a  | Model 3b  | Model 4a  | Model 4b  |
|----------------------------------|-----------|-----------|-----------|-----------|-----------|-----------|-----------|
| <b>Black</b>                     | .154 *    | .098      | -.359 *   | -.358 *   | -.328     | -.304     | -.291     |
| <b>Age</b>                       | .052 ***  | .053 ***  | .054 ***  | .056 ***  | .057 ***  | .059 ***  | .059 ***  |
| <b>Age<sup>2</sup></b>           | -.000 *** | -.000 *** | -.000 *** | -.000 *** | -.000 *** | -.000 *** | -.000 *** |
| <b>Gender (1=female)</b>         | -.015     | -.019     | -.020     | -.024     | -.023     | -.026     | -.025     |
| <b>Black * Age</b>               | .013 *    | .012 *    | .011 *    | .011 *    | .010      | .009      | .009      |
| <b>Black * Age<sup>2</sup></b>   | -.000 *   | -.000 *   | -.000 *   | -.000 *   | -.000 *   | -.000     | -.000     |
| <b>Region (1=South)</b>          | .090 **   | .083 **   | .083 **   | .085 **   | .084 **   | .086 **   | .085 **   |
| <b>Year</b>                      | .008 **   | .009 **   | .009 **   | .007 *    | .007 *    | .006      | .006      |
| <b>Died</b>                      | .022      | .017      | .018      | .021      | .020      | .015      | .014      |
| <b>Income</b>                    |           | -.030 *** | -.053 *** | -.046 *** | -.044 *** | -.038 *** | -.037 *** |
| <b>Black * Income</b>            |           |           | .043 **   | .041 **   | .038 **   | .035 *    | .034 *    |
| <b>Education</b>                 |           |           |           |           |           |           |           |
| High school                      |           | -.180 *** | -.148 **  | -.139 *   | -.138 *   | -.125 *   | -.123 *   |
| Some college                     |           | -.181 **  | -.185 *   | -.174 *   | -.172 *   | -.154 *   | -.151 *   |
| Bachelors                        |           | -.322 *** | -.322 *** | -.306 *** | -.303 *** | -.271 *** | -.268 *** |
| Advanced                         |           | -.379 *** | -.365 *** | -.351 *** | -.349 *** | -.314 *** | -.311 *** |
| <b>Black * Education</b>         |           |           |           |           |           |           |           |
| Black * High school              |           |           | -.081     | -.072     | -.077     | -.078     | -.083     |
| Black * Some college             |           |           | .021      | .034      | .027      | .025      | .018      |
| Black * Bachelors                |           |           | .071      | .069      | .063      | .062      | .052      |
| Black * Advanced                 |           |           | .009      | .007      | .003      | .002      | -.005     |
| <b>Wealth (total net worth)</b>  |           |           |           | -.008 *** | -.010 *** | -.006 *** | -.006 **  |
| <b>Black * Wealth</b>            |           |           |           |           | .004      | .004      | .002      |
| <b>Wealth Components</b>         |           |           |           |           |           |           |           |
| Own home (1=yes)                 |           |           |           |           |           | -.086 **  | -.083 *   |
| Home equity                      |           |           |           |           |           | -.000     | -.001     |
| Savings                          |           |           |           |           |           | -.006 **  | -.008 **  |
| Stocks                           |           |           |           |           |           | -.004 *   | -.004     |
| Debt                             |           |           |           |           |           | .007 ***  | .008 **   |
| <b>Black * Wealth Components</b> |           |           |           |           |           |           |           |
| Black * Own home                 |           |           |           |           |           |           | -.012     |
| Black * Home equity              |           |           |           |           |           |           | .003      |
| Black * Savings                  |           |           |           |           |           |           | .005      |
| Black * Stocks                   |           |           |           |           |           |           | -.004     |

|              |        |     |        |     |        |     |        |     |        |     |        |     |        |     |
|--------------|--------|-----|--------|-----|--------|-----|--------|-----|--------|-----|--------|-----|--------|-----|
| Black * Debt |        |     |        |     |        |     |        |     |        |     |        |     | -0.003 |     |
| Intercept    | -1.919 | *** | -1.331 | *** | -1.079 | *** | -1.123 | *** | -1.136 | *** | -1.202 | *** | -1.207 | *** |
| AIC          | 72,422 |     | 72,335 |     | 72,328 |     | 72,281 |     | 72,280 |     | 72,250 |     | 72,258 |     |

Note: Results of mixed effects Poisson models. Includes random intercepts for individuals and households Years of analysis = 2005-2011.  
n=38,364 person-years; 11,031 unique individuals. Race reference category = White. Education reference category = Less than high school. All  
wealth variables transformed via an inverse hyperbolic sine (IHS) and inflated to 2015 U.S. dollars via the Consumer Price Index.

## Mixed Effects Models for Work Limitations

|                                  | Model 1 | Model 2a   | Model 2b   | Model 3a   | Model 3b   | Model 4a   | Model 4b   |
|----------------------------------|---------|------------|------------|------------|------------|------------|------------|
| <b>Black</b>                     | -0.085  | -0.384 **  | -2.584 *** | -2.393 *** | -2.316 *** | -2.156 *** | -2.171 *** |
| <b>Age</b>                       | 0.046   | 0.055 ***  | 0.060 ***  | 0.069 ***  | 0.070 ***  | 0.072 ***  | 0.071 ***  |
| <b>Age<sup>2</sup></b>           | -0.000  | -0.000 *** | -0.001 *** | -0.001 *** | -0.001 *** | -0.001 *** | -0.001 *** |
| <b>Gender (1=female)</b>         | 0.187   | 0.145 ***  | 0.143 ***  | 0.133 ***  | 0.135 ***  | 0.128 **   | 0.129 **   |
| <b>Black * Age</b>               | 0.012   | 0.011      | 0.004      | 0.002      | 0.000      | -0.002     | 0.001      |
| <b>Black * Age<sup>2</sup></b>   | -0.000  | -0.000     | -0.000     | 0.000      | 0.000      | 0.000      | 0.000      |
| <b>Region (1=South)</b>          | 0.043   | 0.003      | -0.009     | 0.008      | 0.006      | 0.001      | 0.004      |
| <b>Year</b>                      | -0.004  | -0.003     | -0.002     | -0.010     | -0.010     | -0.012     | -0.011     |
| <b>Died</b>                      | 0.904   | 0.787 ***  | 0.774 ***  | 0.752 ***  | 0.753 ***  | 0.738 ***  | 0.736 ***  |
| <b>Income</b>                    |         | -0.225 *** | -0.343 *** | -0.300 *** | -0.296 *** | -0.263 *** | -0.260 *** |
| <b>Black * Income</b>            |         |            | 0.203 ***  | 0.181 ***  | 0.174 ***  | 0.156 ***  | 0.148 ***  |
| <b>Education</b>                 |         |            |            |            |            |            |            |
| High school                      |         | -0.273 *** | -0.258 **  | -0.236 **  | -0.234 **  | -0.185 *   | -0.174     |
| Some college                     |         | -0.343 *** | -0.355 **  | -0.331 **  | -0.330 **  | -0.261 *   | -0.246 *   |
| Bachelors                        |         | -0.732 *** | -0.717 *** | -0.678 *** | -0.675 *** | -0.591 *** | -0.575 *** |
| Advanced                         |         | -0.785 *** | -0.708 *** | -0.675 *** | -0.673 *** | -0.579 *** | -0.563 *** |
| <b>Black * Education</b>         |         |            |            |            |            |            |            |
| Black * High school              |         |            | -0.062     | -0.031     | -0.039     | -0.045     | -0.073     |
| Black * Some college             |         |            | 0.039      | 0.082      | 0.072      | 0.079      | 0.022      |
| Black * Bachelors                |         |            | 0.140      | 0.149      | 0.141      | 0.176      | 0.126      |
| Black * Advanced                 |         |            | -0.162     | -0.164     | -0.168     | -0.120     | -0.180     |
| <b>Wealth (total net worth)</b>  |         |            |            | -0.027 *** | -0.029 *** | -0.016 *** | -0.019 *** |
| <b>Black * Wealth</b>            |         |            |            |            | 0.006      | 0.005      | 0.015 *    |
| <b>Wealth Components</b>         |         |            |            |            |            |            |            |
| Own home (1=yes)                 |         |            |            |            |            | -0.162 *   | -0.122     |
| Home equity                      |         |            |            |            |            | 0.001      | 0.006      |
| Savings                          |         |            |            |            |            | -0.036 *** | -0.044 *** |
| Stocks                           |         |            |            |            |            | -0.003     | -0.003     |
| Debt                             |         |            |            |            |            | 0.018 ***  | 0.014 **   |
| <b>Black * Wealth Components</b> |         |            |            |            |            |            |            |
| Black * Own home                 |         |            |            |            |            |            | -0.073     |
| Black * Home equity              |         |            |            |            |            |            | -0.019     |
| Black * Savings                  |         |            |            |            |            |            | 0.018      |
| Black * Stocks                   |         |            |            |            |            |            | -0.001     |
| Black * Debt                     |         |            |            |            |            |            | 0.013      |
| <b>Intercepts</b>                |         |            |            |            |            |            |            |

|             |        |           |            |            |            |           |           |
|-------------|--------|-----------|------------|------------|------------|-----------|-----------|
| Threshold=1 | 2.884  | -0.172    | -1.513 *** | -1.088 *** | -1.050 *** | -0.733 ** | -0.746 ** |
| Threshold=2 | 3.261  | 0.213     | -1.126 *** | -0.700 **  | -0.662 *   | -0.343    | -0.356    |
| Threshold=3 | 3.924  | 0.888 *** | -0.449     | -0.021     | 0.017      | 0.337     | 0.325     |
| <b>AIC</b>  | 41,642 | 41,155    | 41,124     | 41,047     | 41,046     | 40,989    | 40,991    |

Note: Results of cumulative link mixed models. Includes random intercepts for individuals and households Years of analysis = 2005-2011.  
n=38,510 person-years; 11,039 unique individuals. Race reference category = White. Education reference category = Less than high school. All  
wealth variables transformed via an inverse hyperbolic sine (IHS) and inflated to 2015 U.S. dollars via the Consumer Price Index.

# Mixed Effects Models for Disability

|                                  | Model 1 |     | Model 2a |     | Model 2b |     | Model 3a |     | Model 3b |     | Model 4a |     | Model 4b |     |
|----------------------------------|---------|-----|----------|-----|----------|-----|----------|-----|----------|-----|----------|-----|----------|-----|
| <b>Black</b>                     | -0.649  |     | -1.055   | *   | -3.236   | *** | -3.138   | *** | -3.088   | *** | -2.953   | *** | -2.929   | *** |
| <b>Age</b>                       | 0.092   | *** | 0.100    | *** | 0.105    | *** | 0.118    | *** | 0.120    | *** | 0.132    | *** | 0.130    | *** |
| <b>Age<sup>2</sup></b>           | -0.001  | *** | -0.002   | *** | -0.002   | *** | -0.002   | *** | -0.002   | *** | -0.002   | *** | -0.002   | *** |
| <b>Gender (1=female)</b>         | -0.001  |     | 0.011    |     | 0.014    |     | -0.007   |     | -0.006   |     | -0.035   |     | -0.031   |     |
| <b>Black * Age</b>               | 0.111   | *** | 0.109    | *** | 0.101    | **  | 0.094    | **  | 0.091    | **  | 0.085    | **  | 0.088    | **  |
| <b>Black * Age<sup>2</sup></b>   | -0.002  | **  | -0.002   | **  | -0.001   | *   | -0.001   | *   | -0.001   | *   | -0.001   | *   | -0.001   | *   |
| <b>Region (1=South)</b>          | 0.315   |     | 0.263    |     | 0.241    |     | 0.272    |     | 0.268    |     | 0.282    |     | 0.286    | *   |
| <b>Year</b>                      | 0.021   |     | 0.024    |     | 0.023    |     | 0.010    |     | 0.010    |     | 0.001    |     | 0.001    |     |
| <b>Died</b>                      | 0.835   | *** | 0.782    | *** | 0.772    | *** | 0.763    | *** | 0.763    | *** | 0.736    | *** | 0.741    | *** |
| <b>Income</b>                    |         |     | -0.175   | *** | -0.295   | *** | -0.270   | *** | -0.267   | *** | -0.211   | *** | -0.207   | *** |
| <b>Black * Income</b>            |         |     |          |     | 0.190    | *** | 0.176    | **  | 0.172    | **  | 0.142    | **  | 0.138    | *   |
| <b>Education</b>                 |         |     |          |     |          |     |          |     |          |     |          |     |          |     |
| High school                      |         |     | -1.037   | *** | -1.124   | *** | -1.085   | *** | -1.083   | *** | -0.927   | *** | -0.907   | *** |
| Some college                     |         |     | -1.376   | *** | -1.575   | *** | -1.529   | *** | -1.527   | *** | -1.275   | *** | -1.245   | **  |
| Bachelors                        |         |     | -2.418   | *** | -2.382   | *** | -2.298   | *** | -2.292   | *** | -1.945   | *** | -1.904   | *** |
| Advanced                         |         |     | -2.752   | *** | -2.554   | *** | -2.479   | *** | -2.475   | *** | -2.055   | *** | -2.000   | *** |
| <b>Black * Education</b>         |         |     |          |     |          |     |          |     |          |     |          |     |          |     |
| Black * High school              |         |     |          |     | 0.154    |     | 0.206    |     | 0.195    |     | 0.201    |     | 0.163    |     |
| Black * Some college             |         |     |          |     | 0.445    |     | 0.533    |     | 0.519    |     | 0.578    |     | 0.506    |     |
| Black * Bachelors                |         |     |          |     | -0.184   |     | -0.146   |     | -0.160   |     | -0.080   |     | -0.193   |     |
| Black * Advanced                 |         |     |          |     | -1.213   |     | -1.168   |     | -1.178   |     | -1.046   |     | -1.177   |     |
| <b>Wealth (total net worth)</b>  |         |     |          |     |          |     | -0.038   | *** | -0.042   | *** | -0.029   | **  | -0.026   | *   |
| <b>Black * Wealth</b>            |         |     |          |     |          |     |          |     | 0.008    |     | 0.007    |     | -0.001   |     |
| <b>Wealth Components</b>         |         |     |          |     |          |     |          |     |          |     |          |     |          |     |
| Own home (1=yes)                 |         |     |          |     |          |     |          |     |          |     | -0.431   | **  | -0.215   |     |
| Home equity                      |         |     |          |     |          |     |          |     |          |     | -0.001   |     | -0.012   |     |
| Savings                          |         |     |          |     |          |     |          |     |          |     | -0.055   | *** | -0.074   | *** |
| Stocks                           |         |     |          |     |          |     |          |     |          |     | -0.042   | *   | -0.045   | *   |
| Debt                             |         |     |          |     |          |     |          |     |          |     | -0.010   |     | -0.009   |     |
| <b>Black * Wealth Components</b> |         |     |          |     |          |     |          |     |          |     |          |     |          |     |
| Black * Own home                 |         |     |          |     |          |     |          |     |          |     |          |     | -0.533   |     |
| Black * Home equity              |         |     |          |     |          |     |          |     |          |     |          |     | 0.032    |     |
| Black * Savings                  |         |     |          |     |          |     |          |     |          |     |          |     | 0.039    |     |
| Black * Stocks                   |         |     |          |     |          |     |          |     |          |     |          |     | 0.028    |     |
| Black * Debt                     |         |     |          |     |          |     |          |     |          |     |          |     | -0.005   |     |
| <b>Intercept</b>                 | -6.330  | *** | -2.757   | *** | -1.324   | *   | -1.477   | *   | -1.504   | *   | -1.714   | **  | -1.744   | **  |

| AIC | 10,147 | 9,753 | 9,730 | 9,653 | 9,654 | 9,552 | 9,553 |
|-----|--------|-------|-------|-------|-------|-------|-------|
|-----|--------|-------|-------|-------|-------|-------|-------|

---

Note: Results of mixed effects logit models. Includes random intercepts for individuals and households. Years of analysis = 2005-2011. n=38,523 person-years; 11,039 unique individuals. Race reference category = White. Education reference category = Less than high school. All wealth variables transformed via an inverse hyperbolic sine (IHS) and inflated to 2015 U.S. dollars via the Consumer Price Index.

# Mixed Effects Models for Psychological Distress

|                                  | Model 1 |     | Model 2a |     | Model 2b |     | Model 3a |     | Model 3b |     | Model 4a |     | Model 4b |     |
|----------------------------------|---------|-----|----------|-----|----------|-----|----------|-----|----------|-----|----------|-----|----------|-----|
| <b>Black</b>                     | 0.664   | *** | 0.572    | *** | 0.400    | *   | 0.400    | *   | 0.402    | **  | 0.414    | **  | 0.435    | **  |
| <b>Age</b>                       | -0.036  | *** | -0.036   | *** | -0.036   | *** | -0.035   | *** | -0.035   | *** | -0.033   | *** | -0.033   | *** |
| <b>Age<sup>2</sup></b>           | 0.001   | *** | 0.001    | *** | 0.001    | *** | 0.001    | *** | 0.001    | *** | 0.001    | *** | 0.001    | *** |
| <b>Gender (1=female)</b>         | -1.717  | *** | -1.692   | *** | -1.693   | *** | -1.693   | *** | -1.694   | *** | -1.694   | *** | -1.695   | *** |
| <b>Black * Age</b>               | 0.003   |     | 0.001    |     | 0.001    |     | 0.001    |     | 0.001    |     | 0.000    |     | 0.000    |     |
| <b>Black * Age<sup>2</sup></b>   | -0.000  | *   | -0.000   | *   | -0.000   | *   | -0.000   | *   | -0.000   | *   | -0.000   | *   | -0.000   | *   |
| <b>Region (1=South)</b>          | -0.029  |     | -0.040   |     | -0.045   |     | -0.045   |     | -0.045   |     | -0.041   |     | -0.040   |     |
| <b>Year</b>                      | 0.010   | *** | 0.013    | *** | 0.012    | *** | 0.011    | *** | 0.011    | *** | 0.010    | *** | 0.010    | *** |
| <b>Died</b>                      | -0.007  |     | -0.007   |     | -0.006   |     | -0.004   |     | -0.003   |     | -0.007   |     | -0.005   |     |
| <b>Income</b>                    |         |     | -0.030   | *** | -0.060   | *** | -0.059   | *** | -0.059   | *** | -0.055   | *** | -0.058   | *** |
| <b>Black * Income</b>            |         |     |          |     | 0.046    | *** | 0.046    | *** | 0.046    | *** | 0.043    | *** | 0.048    | *** |
| <b>Education</b>                 |         |     |          |     |          |     |          |     |          |     |          |     |          |     |
| High school                      |         |     | -0.540   | *** | -0.355   | *** | -0.350   | *** | -0.350   | *** | -0.335   | *** | -0.347   | *** |
| Some college                     |         |     | -0.671   | *** | -0.406   | *** | -0.401   | *** | -0.401   | *** | -0.377   | *** | -0.394   | *** |
| Bachelors                        |         |     | -0.900   | *** | -0.697   | *** | -0.689   | *** | -0.689   | *** | -0.649   | *** | -0.670   | *** |
| Advanced                         |         |     | -1.005   | *** | -0.775   | *** | -0.768   | *** | -0.768   | *** | -0.725   | *** | -0.749   | *** |
| <b>Black * Education</b>         |         |     |          |     |          |     |          |     |          |     |          |     |          |     |
| Black * High school              |         |     |          |     | -0.354   | **  | -0.351   | **  | -0.351   | **  | -0.347   | **  | -0.320   | **  |
| Black * Some college             |         |     |          |     | -0.594   | *** | -0.591   | *** | -0.590   | *** | -0.582   | *** | -0.535   | **  |
| Black * Bachelors                |         |     |          |     | -0.387   | *   | -0.390   | *   | -0.389   | *   | -0.387   | *   | -0.327   | *   |
| Black * Advanced                 |         |     |          |     | -0.538   | **  | -0.544   | **  | -0.545   | **  | -0.527   | **  | -0.458   | *   |
| <b>Wealth (total net worth)</b>  |         |     |          |     |          |     | -0.003   | *** | -0.002   | *   | -0.002   |     | -0.002   | *   |
| <b>Black * Wealth</b>            |         |     |          |     |          |     |          |     | -0.002   |     | -0.002   |     | -0.001   |     |
| <b>Wealth Components</b>         |         |     |          |     |          |     |          |     |          |     |          |     |          |     |
| Own home (1=yes)                 |         |     |          |     |          |     |          |     |          |     | -0.088   | *** | -0.088   | *** |
| Home equity                      |         |     |          |     |          |     |          |     |          |     | 0.002    |     | 0.003    |     |
| Savings                          |         |     |          |     |          |     |          |     |          |     | -0.003   |     | 0.003    |     |
| Stocks                           |         |     |          |     |          |     |          |     |          |     | -0.006   | *** | -0.006   | **  |
| Debt                             |         |     |          |     |          |     |          |     |          |     | -0.000   |     | 0.001    |     |
| <b>Black * Wealth Components</b> |         |     |          |     |          |     |          |     |          |     |          |     |          |     |
| Black * Own home                 |         |     |          |     |          |     |          |     |          |     |          |     | 0.006    |     |
| Black * Home equity              |         |     |          |     |          |     |          |     |          |     |          |     | -0.003   |     |
| Black * Savings                  |         |     |          |     |          |     |          |     |          |     |          |     | -0.012   | *** |
| Black * Stocks                   |         |     |          |     |          |     |          |     |          |     |          |     | -0.002   |     |
| Black * Debt                     |         |     |          |     |          |     |          |     |          |     |          |     | -0.003   |     |
| <b>Intercept</b>                 | 0.759   | *** | 1.784    | *** | 1.951    | *** | 1.950    | *** | 1.949    | *** | 1.935    | *** | 1.925    | *** |

| AIC | 127,559 | 127,280 | 127,240 | 127,219 | 127,220 | 127,182 | 127,172 |
|-----|---------|---------|---------|---------|---------|---------|---------|
|-----|---------|---------|---------|---------|---------|---------|---------|

---

Note: Results of mixed effects Poisson models. Includes random intercepts for individuals and households Years of analysis = 2005-2011.  
n=37,672 person-years; 10,905 unique individuals. Race reference category = White. Education reference category = Less than high school. All  
wealth variables transformed via an inverse hyperbolic sine (IHS) and inflated to 2015 U.S. dollars via the Consumer Price Index.



# Mixed Effects Models for Body Mass Index

|                                  | Model 1 |     | Model 2a |     | Model 2b |     | Model 3a |     | Model 3b |     | Model 4a |     | Model 4b |     |
|----------------------------------|---------|-----|----------|-----|----------|-----|----------|-----|----------|-----|----------|-----|----------|-----|
| <b>Black</b>                     | 1.569   | *** | 1.375    | *** | 0.580    |     | 0.597    |     | 0.598    |     | 0.627    |     | 0.607    |     |
| <b>Age</b>                       | 0.114   | *** | 0.112    | *** | 0.113    | *** | 0.115    | *** | 0.115    | *** | 0.119    | *** | 0.118    | *** |
| <b>Age<sup>2</sup></b>           | -0.002  | *** | -0.002   | *** | -0.002   | *** | -0.002   | *** | -0.002   | *** | -0.002   | *** | -0.002   | *** |
| <b>Gender (1=female)</b>         | -0.609  | *** | -0.599   | *** | -0.603   | *** | -0.607   | *** | -0.606   | *** | -0.610   | *** | -0.608   | *** |
| <b>Black * Age</b>               | 0.035   | *   | 0.034    | *   | 0.034    | *   | 0.033    | *   | 0.033    | *   | 0.031    |     | 0.033    | *   |
| <b>Black * Age<sup>2</sup></b>   | -0.001  | *** | -0.001   | *** | -0.001   | **  | -0.001   | **  | -0.001   | **  | -0.001   | **  | -0.001   | **  |
| <b>Region (1=South)</b>          | 0.277   | **  | 0.269    | **  | 0.270    | **  | 0.269    | **  | 0.267    | **  | 0.270    | **  | 0.269    | **  |
| <b>Year</b>                      | 0.047   | *** | 0.051    | *** | 0.051    | *** | 0.048    | *** | 0.048    | *** | 0.047    | *** | 0.047    | *** |
| <b>Died</b>                      | -0.257  | *   | -0.261   | *   | -0.258   | *   | -0.256   | *   | -0.256   | *   | -0.261   | *   | -0.261   | *   |
| <b>Income</b>                    |         |     | -0.052   | **  | -0.094   | *** | -0.088   | *** | -0.087   | *** | -0.080   | *** | -0.078   | **  |
| <b>Black * Income</b>            |         |     |          |     | 0.074    | *   | 0.071    | *   | 0.070    | *   | 0.066    | *   | 0.063    |     |
| <b>Education</b>                 |         |     |          |     |          |     |          |     |          |     |          |     |          |     |
| High school                      |         |     | 0.193    |     | 0.327    |     | 0.341    |     | 0.341    |     | 0.357    |     | 0.366    |     |
| Some college                     |         |     | 0.090    |     | 0.117    |     | 0.135    |     | 0.134    |     | 0.159    |     | 0.172    |     |
| Bachelors                        |         |     | -1.006   | *** | -1.150   | *** | -1.127   | *** | -1.126   | *** | -1.084   | *** | -1.067   | *** |
| Advanced                         |         |     | -1.354   | *** | -1.355   | *** | -1.339   | *** | -1.339   | *** | -1.298   | *** | -1.275   | *** |
| <b>Black * Education</b>         |         |     |          |     |          |     |          |     |          |     |          |     |          |     |
| Black * High school              |         |     |          |     | -0.335   |     | -0.328   |     | -0.331   |     | -0.329   |     | -0.349   |     |
| Black * Some college             |         |     |          |     | -0.041   |     | -0.036   |     | -0.038   |     | -0.038   |     | -0.074   |     |
| Black * Bachelors                |         |     |          |     | 0.985    | *   | 0.975    | *   | 0.972    | *   | 0.969    | *   | 0.917    |     |
| Black * Advanced                 |         |     |          |     | 0.129    |     | 0.126    |     | 0.125    |     | 0.138    |     | 0.071    |     |
| <b>Wealth (total net worth)</b>  |         |     |          |     |          |     | -0.010   | *** | -0.011   | *** | -0.009   | **  | -0.008   | *   |
| <b>Black * Wealth</b>            |         |     |          |     |          |     |          |     | 0.003    |     | 0.004    |     | 0.001    |     |
| <b>Wealth Components</b>         |         |     |          |     |          |     |          |     |          |     |          |     |          |     |
| Own home (1=yes)                 |         |     |          |     |          |     |          |     |          |     | -0.137   | *   | -0.082   |     |
| Home equity                      |         |     |          |     |          |     |          |     |          |     | 0.004    |     | 0.000    |     |
| Savings                          |         |     |          |     |          |     |          |     |          |     | -0.009   |     | -0.016   | *   |
| Stocks                           |         |     |          |     |          |     |          |     |          |     | -0.005   |     | -0.006   |     |
| Debt                             |         |     |          |     |          |     |          |     |          |     | 0.008    | *   | 0.007    |     |
| <b>Black * Wealth Components</b> |         |     |          |     |          |     |          |     |          |     |          |     |          |     |
| Black * Own home                 |         |     |          |     |          |     |          |     |          |     |          |     | -0.172   |     |
| Black * Home equity              |         |     |          |     |          |     |          |     |          |     |          |     | 0.012    |     |
| Black * Savings                  |         |     |          |     |          |     |          |     |          |     |          |     | 0.015    |     |
| Black * Stocks                   |         |     |          |     |          |     |          |     |          |     |          |     | 0.008    |     |
| Black * Debt                     |         |     |          |     |          |     |          |     |          |     |          |     | 0.000    |     |
| <b>Intercepts</b>                | 26.696  | *** | 27.653   | *** | 28.124   | *** | 28.100   | *** | 28.099   | *** | 28.048   | *** | 28.054   | *** |

| <b>AIC</b>                                                                                                                                                                                                                                                                                                                                                                                                            | 198,292 | 198,201 | 198,196 | 198,194 | 198,204 | 198,241 | 198,278 |
|-----------------------------------------------------------------------------------------------------------------------------------------------------------------------------------------------------------------------------------------------------------------------------------------------------------------------------------------------------------------------------------------------------------------------|---------|---------|---------|---------|---------|---------|---------|
| Note: Results of linear mixed effects models. Includes random intercepts for individuals and households Years of analysis = 2005-2011. n=37,574 person-years; 10,953 unique individuals. Race reference category = White. Education reference category = Less than high school. All wealth variables transformed via an inverse hyperbolic sine (IHS) and inflated to 2015 U.S. dollars via the Consumer Price Index. |         |         |         |         |         |         |         |
